# Supplementary material for: NULISA: a proteomic liquid biopsy platform with attomolar sensitivity and high multiplexing
Source: PubMed Central journal article supplement (PMC10636041; doi:10.1038/s41467-023-42834-x), 2023-11-09
Supplement: 41467_2023_42834_MOESM9_ESM.pdf [file 41467_2023_42834_MOESM9_ESM.pdf]

## Reporting Summary

Nature Portfolio wishes to improve the reproducibility of the work that we publish. This form provides structure for consistency and transparency in reporting. For further information on Nature Portfolio policies, see our [Editorial Policies](#) and the [Editorial Policy Checklist](#).

### Statistics

For all statistical analyses, confirm that the following items are present in the figure legend, table legend, main text, or Methods section.

n/a Confirmed

- The exact sample size ( $n$ ) for each experimental group/condition, given as a discrete number and unit of measurement
- A statement on whether measurements were taken from distinct samples or whether the same sample was measured repeatedly
- The statistical test(s) used AND whether they are one- or two-sided  
*Only common tests should be described solely by name; describe more complex techniques in the Methods section.*
- A description of all covariates tested
- A description of any assumptions or corrections, such as tests of normality and adjustment for multiple comparisons
- A full description of the statistical parameters including central tendency (e.g. means) or other basic estimates (e.g. regression coefficient) AND variation (e.g. standard deviation) or associated estimates of uncertainty (e.g. confidence intervals)
- For null hypothesis testing, the test statistic (e.g.  $F$ ,  $t$ ,  $r$ ) with confidence intervals, effect sizes, degrees of freedom and  $P$  value noted  
*Give  $P$  values as exact values whenever suitable.*
- For Bayesian analysis, information on the choice of priors and Markov chain Monte Carlo settings
- For hierarchical and complex designs, identification of the appropriate level for tests and full reporting of outcomes
- Estimates of effect sizes (e.g. Cohen's  $d$ , Pearson's  $r$ ), indicating how they were calculated

*Our web collection on [statistics for biologists](#) contains articles on many of the points above.*

### Software and code

Policy information about [availability of computer code](#)

Data collection qPCR data was collected using BioRad CFX Maestro Manager 2.2 (v4.2.008.0222), NGS data was collected using Illumina BaseSpace Sequence Hub (v7.9.0) and ARGO Command Center (v0.2.0.0).

Data analysis All data analyses were performed using R software (v.4.2.0, R Core Team, 2021). An open-source R package (GPLv3) for analyzing NULISaseq data is available at <https://github.com/Alamar-Biosciences/NULISaseqR> (v1.0).

For manuscripts utilizing custom algorithms or software that are central to the research but not yet described in published literature, software must be made available to editors and reviewers. We strongly encourage code deposition in a community repository (e.g. GitHub). See the Nature Portfolio [guidelines for submitting code & software](#) for further information.

### Data

Policy information about [availability of data](#)

All manuscripts must include a [data availability statement](#). This statement should provide the following information, where applicable:

- Accession codes, unique identifiers, or web links for publicly available datasets
- A description of any restrictions on data availability
- For clinical datasets or third party data, please ensure that the statement adheres to our [policy](#)

All data generated and analyzed in this study are included in this manuscript, its supplementary information, or have been made available in public repositories. Reference concentrations of blood proteins are available at Human Protein Atlas (<https://www.proteinatlas.org/humanproteome/blood+protein>). The NULISaseq

200-plex Inflammation Panel data and Olink Explore Inflammation Panel data generated in this study have been deposited in the National Center for Biotechnology Information (NCBI) Gene Expression Omnibus (GEO) database under accession code GSE241717 [https://www.ncbi.nlm.nih.gov/geo/query/acc.cgi?acc=GSE241717].

Source data for Figures 2b, 2c, 3c, and 4a are provided with the paper. Figures 3a and 3b were generated using data in Supplementary Data 1. Figure 3d was generated using data in the Alamar\_NULISaseq\_Detectability\_NPQ.csv file available under accession GSM7734322 [https://www.ncbi.nlm.nih.gov/geo/query/acc.cgi?acc=GSM7734322]. Figures 4b, 4c, 4d, and 4e were generated using data in Supplementary Data 2. Figures 5a and 5b were generated using data in the Alamar\_NULISaseq\_COVID\_NPQ.csv file available under accession GSM7734324 [https://www.ncbi.nlm.nih.gov/geo/query/acc.cgi?acc=GSM7734324].

## Research involving human participants, their data, or biological material

Policy information about studies with [human participants or human data](#). See also policy information about [sex, gender \(identity/presentation\), and sexual orientation](#) and [race, ethnicity and racism](#).

|                                                                    |                                                                                                                                                                                                                                                                                                                                                                                                                                                                                                                                                                                                                                                                     |
|--------------------------------------------------------------------|---------------------------------------------------------------------------------------------------------------------------------------------------------------------------------------------------------------------------------------------------------------------------------------------------------------------------------------------------------------------------------------------------------------------------------------------------------------------------------------------------------------------------------------------------------------------------------------------------------------------------------------------------------------------|
| Reporting on sex and gender                                        | Sex was included as a covariate in differential expression models comparing samples from patients with inflammatory disease (n=21, 18 female) and healthy controls (n=72, 42 female), and in models assessing the differences between mild COVID-19 (n=9, 6 female) and healthy control (n=16, 7 female). Because the impact of sex on protein abundance was not of primary interest in this study, we do not report statistics for the sex covariate. However, the data, including age and sex, are available in the files uploaded to National Center for Biological Information (NCBI) Gene Expression Omnibus (GEO) repository with accession number GSE241717. |
| Reporting on race, ethnicity, or other socially relevant groupings | Age and sex were the only potential confounding variables considered in the linear models. We did not have information about other socially relevant groupings for these data, unfortunately. We may not have had the statistical power to include more potential confounders, such as race, ethnicity, or other socially relevant groupings.                                                                                                                                                                                                                                                                                                                       |
| Population characteristics                                         | Patient demographics and characteristics are summarized in Supplementary Tables 1, 2 and 4.                                                                                                                                                                                                                                                                                                                                                                                                                                                                                                                                                                         |
| Recruitment                                                        | This cohort has been described previously: Jalota, A., Hershberger, C. E., Patel, M. S., Mian, A., Khademi, G., Rotroff, D. M., Hill, B. T., & Gupta, N. (n.d.). Host metabolome predicts the severity and onset of acute toxicities induced by CAR T-cell therapy Clinical trial registration information (if any): Host metabolome predicts the severity and onset of acute toxicities induced by CAR T-cell 1 therapy 2 3. <a href="https://doi.org/10.1182/bloodadvances.2022007456/2007084/bloodadvances.2022007456.pdf">https://doi.org/10.1182/bloodadvances.2022007456/2007084/bloodadvances.2022007456.pdf</a>                                             |
| Ethics oversight                                                   | The COVID-19 study was approved by th University Hospital of Bonn institutional research ethics board (ethics vote 468/20).                                                                                                                                                                                                                                                                                                                                                                                                                                                                                                                                         |

Note that full information on the approval of the study protocol must also be provided in the manuscript.

## Field-specific reporting

Please select the one below that is the best fit for your research. If you are not sure, read the appropriate sections before making your selection.

Life sciences  Behavioural & social sciences  Ecological, evolutionary & environmental sciences

For a reference copy of the document with all sections, see [nature.com/documents/nr-reporting-summary-flat.pdf](https://www.nature.com/documents/nr-reporting-summary-flat.pdf)

## Life sciences study design

All studies must disclose on these points even when the disclosure is negative.

|                 |                                                                                                                                                                                                                                                                                                                                                                                                                                                                                                                                                                              |
|-----------------|------------------------------------------------------------------------------------------------------------------------------------------------------------------------------------------------------------------------------------------------------------------------------------------------------------------------------------------------------------------------------------------------------------------------------------------------------------------------------------------------------------------------------------------------------------------------------|
| Sample size     | no sample size calculation was performed. Study sample sizes were based on sample availability.                                                                                                                                                                                                                                                                                                                                                                                                                                                                              |
| Data exclusions | two data points were excluded in the COVID-19 data analysis of differential expression because no N protein data were available                                                                                                                                                                                                                                                                                                                                                                                                                                              |
| Replication     | NULISaseq data for sample detectability and COVID-19 were not replicated as each sample was measured once. This was because each clinical sample was unique and repeated samples from the same patients were not available. A technical replicate was included on each run to assess technical variation.                                                                                                                                                                                                                                                                    |
| Randomization   | Since we aimed to study blood proteomic inflammatory profiles in disease (inflammatory diseases, COVID-19) versus healthy individuals, no randomization of group assignment was done, but rather a case-control type study design was employed. Differences in age and sex between disease and healthy groups were accounted for by using these variables as covariates in linear models. Randomization was applied when assigning samples to the different assay plates, to prevent potential confounding of the biological factors of interest based on run-run variation. |
| Blinding        | Given the case-control nature of the study, investigators were not blinded during collection or analysis. The lack of blinding is not expected to have impacted the data collection (blood samples) or analysis. Disease status was necessary for investigators to know for the purposes of randomization to assay plates and analysis of the biological factors of interest (e.g., impact of disease status on protein abundance).                                                                                                                                          |

## Reporting for specific materials, systems and methods

## Materials & experimental systems

## Methods

| n/a                                 | Involved in the study                                  |
|-------------------------------------|--------------------------------------------------------|
| <input type="checkbox"/>            | <input checked="" type="checkbox"/> Antibodies         |
| <input checked="" type="checkbox"/> | <input type="checkbox"/> Eukaryotic cell lines         |
| <input checked="" type="checkbox"/> | <input type="checkbox"/> Palaeontology and archaeology |
| <input checked="" type="checkbox"/> | <input type="checkbox"/> Animals and other organisms   |
| <input checked="" type="checkbox"/> | <input type="checkbox"/> Clinical data                 |
| <input checked="" type="checkbox"/> | <input type="checkbox"/> Dual use research of concern  |
| <input checked="" type="checkbox"/> | <input type="checkbox"/> Plants                        |

| n/a                                 | Involved in the study                           |
|-------------------------------------|-------------------------------------------------|
| <input checked="" type="checkbox"/> | <input type="checkbox"/> ChIP-seq               |
| <input checked="" type="checkbox"/> | <input type="checkbox"/> Flow cytometry         |
| <input checked="" type="checkbox"/> | <input type="checkbox"/> MRI-based neuroimaging |

## Antibodies

### Antibodies used

All antibodies used in this study were primary antibodies. No secondary antibodies were used. The antibodies used in the NULISeq 200-plex Inflammation Panel were listed in Supplementary Data 5 and shown below, containing target name, unique Alamar antibody ID, host species and clonality. This will allow researchers who wish to replicate the work to use the same reagents. In addition, antibodies were conjugated to DNA and purified by Alamar.

„Capture antibody,,,Detection antibody,,  
 Target,Uniprot,Alamar Antibody ID,Host Species,Clonality,Alamar Antibody ID,Host Species,Clonality  
 Activin AB,P08476,cAb3150,Mouse,Monoclonal,cAb2779,Mouse,Monoclonal  
 AGER,Q15109,cAb3592,Rabbit,Monoclonal,cAb3562,Rabbit,Monoclonal  
 AGRP,O00253,cAb3661,Goat,Polyclonal,cAb1304,Rabbit,Monoclonal  
 ANGPT1,Q15389,cAb2443,Goat,Polyclonal,cAb2444,Mouse,Monoclonal  
 ANXA1,P04083,cAb4435,Mouse,Monoclonal,cAb4436,Mouse,Monoclonal  
 BDNF,P23560,cAb3338,Rabbit,Polyclonal,cAb3915,Mouse,Monoclonal  
 BMP10,O95393,cAb3925,Mouse,Monoclonal,cAb2551,Mouse,Monoclonal  
 BMP7,P18075,cAb2059,Mouse,Monoclonal,cAb1569,Rabbit,Monoclonal  
 C1QA,P02745,cAb1503,Rabbit,Monoclonal,cAb1504,Rabbit,Monoclonal  
 CCL1,P22362,cAb4340,Mouse,Monoclonal,cAb4343,Goat,Polyclonal  
 CCL13,Q99616,cAb486,Rabbit,Monoclonal,cAb481,Rabbit,Monoclonal  
 CCL14,Q16627,cAb1581,Rabbit,Monoclonal,cAb1582,Rabbit,Monoclonal  
 CCL15,Q16663,cAb2851,Mouse,Monoclonal,cAb4255,Goat,Polyclonal  
 CCL16,Q15467,cAb1586,Rabbit,Monoclonal,cAb1585,Rabbit,Monoclonal  
 CCL17,Q92583,cAb2012,Mouse,Monoclonal,cAb3662,Rabbit,Monoclonal  
 CCL19,Q99731,cAb1587,Rabbit,Monoclonal,cAb1588,Rabbit,Monoclonal  
 CCL2,P13500,cAb3392,Mouse,Monoclonal,cAb3625,Mouse,Monoclonal  
 CCL20,P78556,cAb3397,Rabbit,Monoclonal,cAb3629,Rabbit,Monoclonal  
 CCL22,O00626,cAb1589,Rabbit,Monoclonal,cAb1590,Rabbit,Monoclonal  
 CCL23,P55773,cAb838,Rabbit,Monoclonal,cAb839,Rabbit,Monoclonal  
 CCL24,O00175,cAb577,Rabbit,Monoclonal,cAb576,Rabbit,Monoclonal  
 CCL25,O15444,cAb634,Rabbit,Monoclonal,cAb635,Rabbit,Monoclonal  
 CCL28,Q9NRJ3,cAb2036,Goat,Polyclonal,cAb2014,Mouse,Monoclonal  
 CCL3,P10147,cAb408,Rabbit,Monoclonal,cAb440,Rabbit,Monoclonal  
 CCL4,P13236,cAb2929,Rabbit,Monoclonal,cAb2930,Rabbit,Monoclonal  
 CCL5,P13501,cAb3700,Rabbit,Monoclonal,cAb3701,Rabbit,Monoclonal  
 CCL7,P80098,cAb2046,Goat,Polyclonal,cAb1441,Rabbit,Monoclonal  
 CCL8,P80075,cAb528,Rabbit,Monoclonal,cAb410,Rabbit,Monoclonal  
 CD200,P41217,cAb1597,Rabbit,Monoclonal,cAb1598,Rabbit,Monoclonal  
 CD200R1,Q8TD46,cAb1599,Rabbit,Monoclonal,cAb1600,Rabbit,Monoclonal  
 CD274,Q9NZQ7,cAb674,Rabbit,Monoclonal,cAb675,Rabbit,Monoclonal  
 CD276,Q5ZPR3,cAb3703,Rabbit,Monoclonal,cAb3702,Rabbit,Monoclonal  
 CD40,P25942,cAb4341,Rabbit,Monoclonal,cAb4344,Rabbit,Monoclonal  
 CD70,P32970,cAb413,Rabbit,Monoclonal,cAb412,Rabbit,Monoclonal  
 CD83,Q01151,cAb729,Rabbit,Monoclonal,cAb730,Rabbit,Monoclonal  
 CD93,Q9NPPY3,cAb1617,Rabbit,Monoclonal,cAb1618,Rabbit,Monoclonal  
 CEACAM5,P06731,cAb3394,Mouse,Monoclonal,cAb3627,Mouse,Monoclonal  
 CHI3L1,P36222,cAb3418,Rabbit,Monoclonal,cAb3649,Rabbit,Monoclonal  
 CLCF1,Q9UBD9,cAb4071,Mouse,Monoclonal,cAb4070,Goat,Polyclonal  
 CLEC4A,Q9UMR7,cAb1875,Mouse,Monoclonal,cAb1876,Mouse,Monoclonal  
 CSF1,P09603,cAb3395,Rabbit,Monoclonal,cAb911,Rabbit,Monoclonal  
 CSF2RB,P32927,cAb4437,Human,Monoclonal,cAb3037,Goat,Monoclonal  
 CSF3,P09919,cAb913,Rabbit,Monoclonal,cAb914,Rabbit,Monoclonal  
 CSF3R,Q99062,cAb3028,Rabbit,Monoclonal,cAb3025,Mouse,Monoclonal  
 CST7,O76096,cAb3230,Rabbit,Polyclonal,cAb3231,Mouse,Monoclonal  
 CTF1,Q16619,cAb2331,Rabbit,Monoclonal,cAb2332,Rabbit,Monoclonal  
 CTLA4,P16410,cAb2265,Mouse,Monoclonal,cAb4226,Rabbit,Monoclonal  
 CTSS,P25774,cAb4196,Rabbit,Polyclonal,cAb3446,Goat,Polyclonal

CX3CL1, P78423, cAb4203, Rabbit, Polyclonal, cAb4203, Rabbit, Polyclonal  
 CXADR, P78310, cAb847, Rabbit, Monoclonal, cAb846, Rabbit, Monoclonal  
 CXCL1, P09341, cAb1626, Rabbit, Monoclonal, cAb1625, Rabbit, Monoclonal  
 CXCL10, P02778, cAb1364, Rabbit, Monoclonal, cAb1365, Rabbit, Monoclonal  
 CXCL12, P48061, cAb2049, Goat, Polyclonal, cAb3420, Rabbit, Polyclonal  
 CXCL13, O43927, cAb3401, Rabbit, Monoclonal, cAb3633, Rabbit, Monoclonal  
 CXCL14, O95715, cAb3452, Rat, Monoclonal, cAb4373, Goat, Polyclonal  
 CXCL2, P19875, cAb1627, Rabbit, Monoclonal, cAb1628, Rabbit, Monoclonal  
 CXCL3, P19876, cAb3403, Rabbit, Monoclonal, cAb3635, Rabbit, Monoclonal  
 CXCL5, P42830, cAb142, Mouse, Monoclonal, cAb143, Mouse, Monoclonal  
 CXCL8, P10145, cAb068, Mouse, Monoclonal, cAb4595, Mouse, Monoclonal  
 CXCL9, Q07325, cAb4342, Rabbit, Monoclonal, cAb3739, Rabbit, Monoclonal  
 EGF, P01133, cAb426, Rabbit, Monoclonal, cAb409, Rabbit, Monoclonal  
 EPO, P01588, cAb1634, Rabbit, Monoclonal, cAb1633, Rabbit, Monoclonal  
 FAM3D, Q96BQ1, cAb2343, Mouse, Monoclonal, cAb2344, Goat, Monoclonal  
 FASLG, P48023, cAb2019, Mouse, Monoclonal, cAb3663, Goat, Monoclonal  
 FGF19, O95750, cAb1644, Rabbit, Monoclonal, cAb1643, Rabbit, Monoclonal  
 FGF2, P09038, cAb3406, Rabbit, Monoclonal, cAb3637, Rabbit, Monoclonal  
 FGF21, Q9NSA1, cAb3763, Rabbit, Monoclonal, cAb3762, Rabbit, Monoclonal  
 FGF23, Q9GZV9, cAb2069, Mouse, Monoclonal, cAb2092, Goat, Polyclonal  
 FLT1, P17948, cAb1645, Rabbit, Monoclonal, cAb1646, Rabbit, Monoclonal  
 FLT3LG, P49771, cAb1647, Rabbit, Monoclonal, cAb1648, Rabbit, Monoclonal  
 FTH1, P02794, cAb2182, Mouse, Monoclonal, cAb2183, Mouse, Monoclonal  
 GDF15, Q99988, cAb3770, Mouse, Monoclonal, cAb3771, Mouse, Monoclonal  
 GDF2, Q9UK05, cAb3405, Rabbit, Monoclonal, cAb3636, Rabbit, Monoclonal  
 GFAP, P14136, cAb3408, Rabbit, Monoclonal, cAb3639, Rabbit, Monoclonal  
 GRN, P28799, cAb3404, Rabbit, Monoclonal, cAb649, Rabbit, Monoclonal  
 GZMB, P10144, cAb3471, Rabbit, Monoclonal, cAb3472, Human, Monoclonal  
 HGF, P14210, cAb806, Rabbit, Monoclonal, cAb923, Rabbit, Monoclonal  
 IFNA1, IFNA13, P01562, cAb496, Rabbit, Monoclonal, cAb497, Rabbit, Monoclonal  
 IFNA2, P01563, cAb2364, Mouse, Monoclonal, cAb4397, Mouse, Monoclonal  
 IFNB1, P01574, cAb1664, Rabbit, Monoclonal, cAb1663, Rabbit, Monoclonal  
 IFNG, P01579, cAb2291, Mouse, Monoclonal, cAb2073, Mouse, Monoclonal  
 IFNL1, Q8IU54, cAb2528, Rabbit, Monoclonal, cAb2523, Mouse, Monoclonal  
 IFNW1, P05000, cAb1462, Rabbit, Monoclonal, cAb3658, Mouse, Monoclonal  
 IL-12p70, P29459, cAb1810, Rabbit, Monoclonal, cAb3085, Rabbit, Monoclonal  
 IL-23, Q9NPF7, cAb1810, Rabbit, Monoclonal, cAb3092, Rabbit, Monoclonal  
 IL-27, Q8NEV9, cAb1810, Rabbit, Monoclonal, cAb454, Rabbit, Monoclonal  
 IL-35, P29459, cAb404, Rat, Monoclonal, cAb3085, Rabbit, Monoclonal  
 IL-39, Q9NPF7, cAb752, Rabbit, Monoclonal, cAb3092, Rabbit, Monoclonal  
 IL10, P22301, cAb2042, Goat, Polyclonal, cAb405, Rat, Monoclonal  
 IL10RB, Q08334, cAb450, Rabbit, Monoclonal, cAb753, Rabbit, Monoclonal  
 IL11, P20809, cAb450, Rabbit, Monoclonal, cAb3656, Goat, Monoclonal  
 IL12B, P29460, cAb450, Rabbit, Monoclonal, cAb536, Rabbit, Monoclonal  
 IL12RB1, P42701, cAb1324, Rabbit, Monoclonal, cAb1325, Rabbit, Monoclonal  
 IL13, P35225, cAb1520, Rabbit, Monoclonal, cAb1521, Rabbit, Monoclonal  
 IL13RA2, Q14627, cAb3398, Rabbit, Monoclonal, cAb3630, Rabbit, Monoclonal  
 IL15RA, Q13261, cAb3399, Rabbit, Monoclonal, cAb3631, Rabbit, Monoclonal  
 IL16, Q14005, cAb652, Rabbit, Monoclonal, cAb4884, Goat, Monoclonal  
 IL17A, Q16552, cAb4193, Mouse, Monoclonal, cAb3489, Mouse, Monoclonal  
 IL17B, Q9UHF5, cAb3400, Rabbit, Monoclonal, cAb3632, Rabbit, Monoclonal  
 IL17C, Q9POM4, cAb1669, Rabbit, Monoclonal, cAb1670, Rabbit, Monoclonal  
 IL17F, Q96PD4, cAb1796, Rabbit, Monoclonal, cAb1797, Rabbit, Monoclonal  
 IL17RB, Q9NRM6, cAb754, Rabbit, Monoclonal, cAb755, Rabbit, Monoclonal  
 IL18, Q14116, cAb3390, Rabbit, Monoclonal, cAb3797, Rabbit, Monoclonal  
 IL18BP, O95998, cAb1674, Rabbit, Monoclonal, cAb3493, Goat, Polyclonal  
 IL18R1, Q13478, cAb1921, Rabbit, Monoclonal, cAb1922, Mouse, Monoclonal  
 IL19, Q9UHD0, cAb1150, Rabbit, Monoclonal, cAb1463, Rabbit, Monoclonal  
 IL1B, P01584, cAb4557, Mouse, Monoclonal, cAb4905, Goat, Monoclonal  
 IL1R2, P27930, cAb809, Rabbit, Monoclonal, cAb810, Rabbit, Monoclonal  
 IL1RL1, Q01638, cAb3800, Rabbit, Monoclonal, cAb4264, Rabbit, Monoclonal  
 IL1RN, P18510, cAb541, Rabbit, Monoclonal, cAb542, Rabbit, Monoclonal  
 IL20, Q9NYY1, cAb423, Rabbit, Monoclonal, cAb543, Rabbit, Monoclonal  
 IL22, Q9GZX6, cAb3499, Mouse, Monoclonal, cAb3498, Mouse, Monoclonal  
 IL2RA, P01589, cAb1678, Rabbit, Monoclonal, cAb1677, Rabbit, Monoclonal  
 IL2RB, P14784, cAb1679, Rabbit, Monoclonal, cAb1680, Rabbit, Monoclonal  
 IL32, P24001, cAb1465, Rabbit, Monoclonal, cAb3517, Goat, Polyclonal  
 IL33, O95760, cAb4293, Mouse, Monoclonal, cAb4263, Goat, Monoclonal  
 IL34, Q6ZMJ4, cAb3402, Rabbit, Monoclonal, cAb3634, Rabbit, Monoclonal  
 IL36A, Q9UHA7, cAb1466, Rabbit, Monoclonal, cAb1467, Rabbit, Monoclonal  
 IL36G, Q9NZH8, cAb3527, Goat, Polyclonal, cAb3268, Mouse, Monoclonal  
 IL3RA, P26951, cAb1328, Rabbit, Monoclonal, cAb1329, Rabbit, Monoclonal  
 IL4, P05112, cAb3802, Mouse, Monoclonal, cAb4207, Rat, Monoclonal  
 IL4R, P24394, cAb3905, Rabbit, Monoclonal, cAb3906, Rabbit, Monoclonal  
 IL5, P05113, cAb609, Rabbit, Monoclonal, cAb4538, Rabbit, Monoclonal  
 IL5RA, Q01344, cAb1684, Rabbit, Monoclonal, cAb1683, Rabbit, Monoclonal

IL6,P05231,cAb1798,Rabbit,Monoclonal,cAb5144,Rabbit,Monoclonal  
 IL6R,P08887,cAb1686,Rabbit,Monoclonal,cAb1685,Rabbit,Monoclonal  
 IL7,P13232,cAb425,Rabbit,Monoclonal,cAb547,Rabbit,Monoclonal  
 IL7R,P16871,cAb1689,Rabbit,Monoclonal,cAb1690,Rabbit,Monoclonal  
 IL9,P15248,cAb2128,Mouse,Monoclonal,cAb455,Rabbit,Monoclonal  
 INHBA,P08476,cAb3150,Mouse,Monoclonal,cAb3150,Mouse,Monoclonal  
 INHBB,P09529,cAb2779,Mouse,Monoclonal,cAb2779,Mouse,Monoclonal  
 Inhibin A,P05111,cAb2812,Mouse,Monoclonal,cAb3150,Mouse,Monoclonal  
 Inhibin B,P05111,cAb2812,Mouse,Monoclonal,cAb2779,Mouse,Monoclonal  
 IRAK4,Q9NWX3,cAb500,Rabbit,Monoclonal,cAb501,Rabbit,Monoclonal  
 KDR,P35968,cAb980,Rabbit,Monoclonal,cAb981,Rabbit,Monoclonal  
 KITLG,P21583,cAb2316,Rabbit,Monoclonal,cAb2314,Rabbit,Monoclonal  
 LAG3,P18627,cAb989,Rabbit,Monoclonal,cAb988,Rabbit,Monoclonal  
 LAMP3,Q9UQV4,cAb1931,Rabbit,Monoclonal,cAb1930,Rabbit,Monoclonal  
 LCN2,P80188,cAb3393,Mouse,Monoclonal,cAb3626,Mouse,Monoclonal  
 LGALS9,O00182,cAb757,Rabbit,Monoclonal,cAb2309,Rabbit,Monoclonal  
 LIF,P15018,cAb4295,Mouse,Monoclonal,cAb3818,Mouse,Monoclonal  
 LTBR,P36941,cAb4106,Goat,Polyclonal,cAb2911,Mouse,Monoclonal  
 MDK,P21741,cAb1709,Rabbit,Monoclonal,cAb1708,Rabbit,Monoclonal  
 MERTK,Q12866,cAb816,Rabbit,Monoclonal,cAb815,Rabbit,Monoclonal  
 MET,P08581,cAb3822,Rabbit,Monoclonal,cAb3283,Mouse,Monoclonal  
 MICA,Q29983,cAb3164,Mouse,Monoclonal,cAb4215,Mouse,Monoclonal  
 MICB,Q29980,cAb3407,Rabbit,Monoclonal,cAb3638,Rabbit,Monoclonal  
 MIF,P14174,cAb570,Rabbit,Monoclonal,cAb1524,Rabbit,Monoclonal  
 MMP10,P09238,cAb2505,Mouse,Monoclonal,cAb2509,Mouse,Monoclonal  
 MMP12,P39900,cAb760,Rabbit,Monoclonal,cAb761,Rabbit,Monoclonal  
 MMP3,P08254,cAb3412,Rabbit,Monoclonal,cAb3643,Rabbit,Monoclonal  
 MMP8,P22894,cAb548,Rabbit,Monoclonal,cAb549,Rabbit,Monoclonal  
 MMP9,P14780,cAb1711,Rabbit,Monoclonal,cAb1713,Rabbit,Monoclonal  
 MPO,P05164,cAb3826,Mouse,Monoclonal,cAb3827,Mouse,Monoclonal  
 MUC16,Q8WXI7,cAb670,Rabbit,Monoclonal,cAb671,Rabbit,Monoclonal  
 NCR1,Q76036,cAb673,Rabbit,Monoclonal,cAb672,Rabbit,Monoclonal  
 NGF,P01138,cAb2161,Rabbit,Monoclonal,cAb1950,Rabbit,Monoclonal  
 OSM,P13725,cAb616,Rabbit,Monoclonal,cAb617,Rabbit,Monoclonal  
 PDCD1,Q15116,cAb3410,Rabbit,Monoclonal,cAb3641,Rabbit,Monoclonal  
 PDGFA,P04085,cAb938,Rabbit,Monoclonal,cAb3534,Mouse,Monoclonal  
 PTX3,P26022,cAb1734,Rabbit,Monoclonal,cAb1735,Rabbit,Monoclonal  
 S100A12,P80511,cAb1743,Rabbit,Monoclonal,cAb1742,Rabbit,Monoclonal  
 S100A9,P06702,cAb1746,Rabbit,Monoclonal,cAb1747,Rabbit,Monoclonal  
 SCG2,P13521,cAb1296,Rabbit,Monoclonal,cAb1295,Rabbit,Monoclonal  
 SELE,P16581,cAb1748,Rabbit,Monoclonal,cAb1749,Rabbit,Monoclonal  
 SLURP1,P55000,cAb4438,Rabbit,Polyclonal,cAb2419,Mouse,Monoclonal  
 SPP1,P10451,cAb1763,Rabbit,Monoclonal,cAb1762,Rabbit,Monoclonal  
 TAF5,Q7Z5A7,cAb4077,Rat,Monoclonal,cAb2833,Goat,Monoclonal  
 TGFB1,P01137,cAb2028,Mouse,Monoclonal,cAb3937,Mouse,Monoclonal  
 TGFB3,P10600,cAb3884,Rabbit,Monoclonal,cAb3885,Rabbit,Monoclonal  
 THPO,P40225,cAb3657,Goat,Polyclonal,cAb1771,Rabbit,Monoclonal  
 TIMP1,P01033,cAb345,Rabbit,Monoclonal,cAb344,Rabbit,Monoclonal  
 TIMP2,P16035,cAb3413,Rabbit,Monoclonal,cAb3644,Rabbit,Monoclonal  
 TLR3,O15455,cAb1490,Rabbit,Monoclonal,cAb1491,Rabbit,Monoclonal  
 TNF,P01375,cAb4576,Mouse,Monoclonal,cAb4065,Mouse,Monoclonal  
 TNFRSF11A,Q9Y6Q6,cAb1198,Rabbit,Monoclonal,cAb1197,Rabbit,Monoclonal  
 TNFRSF13C,Q96RJ3,cAb2916,Rabbit,Monoclonal,cAb2062,Goat,Polyclonal  
 TNFRSF14,Q92956,cAb3889,Rabbit,Monoclonal,cAb3890,Rabbit,Monoclonal  
 TNFRSF17,Q02223,cAb3891,Rabbit,Monoclonal,cAb3892,Rabbit,Monoclonal  
 TNFRSF18,Q9Y5U5,cAb3303,Rabbit,Monoclonal,cAb3304,Rabbit,Monoclonal  
 TNFRSF1A,P19438,cAb1776,Rabbit,Monoclonal,cAb1777,Rabbit,Monoclonal  
 TNFRSF1B,P20333,cAb3414,Rabbit,Monoclonal,cAb3645,Rabbit,Monoclonal  
 TNFRSF4,P43489,cAb3415,Rabbit,Monoclonal,cAb3646,Rabbit,Monoclonal  
 TNFRSF8,P28908,cAb1778,Rabbit,Monoclonal,cAb1779,Rabbit,Monoclonal  
 TNFRSF9,Q07011,cAb3928,Mouse,Monoclonal,cAb3110,Rabbit,Monoclonal  
 TNFSF10,P50591,cAb3918,Mouse,Monoclonal,cAb4188,Mouse,Monoclonal  
 TNFSF11,O14788,cAb3186,Mouse,Monoclonal,cAb3188,Rabbit,Monoclonal  
 TNFSF12,O43508,cAb1783,Rabbit,Monoclonal,cAb1782,Rabbit,Monoclonal  
 TNFSF13B,Q9Y275,cAb4371,Goat,Polyclonal,cAb2864,Rabbit,Monoclonal  
 TNFSF15,O95150,cAb1803,Rabbit,Monoclonal,cAb1802,Rabbit,Monoclonal  
 TNFSF4,P23510,cAb625,Rabbit,Monoclonal,cAb624,Rabbit,Monoclonal  
 TNFSF8,P32971,cAb3416,Rabbit,Monoclonal,cAb3647,Rabbit,Monoclonal  
 TNFSF9,P41273,cAb3417,Rabbit,Monoclonal,cAb3648,Rabbit,Monoclonal  
 TREM1,Q9NP99,cAb2103,Mouse,Monoclonal,cAb3296,Rabbit,Monoclonal  
 TSLP,Q969D9,cAb323,Mouse,Monoclonal,cAb3624,Mouse,Monoclonal  
 VCAM1,P19320,cAb1786,Rabbit,Monoclonal,cAb1787,Rabbit,Monoclonal  
 VEGFA,P15692,cAb3253,Rabbit,Monoclonal,cAb3252,Mouse,Monoclonal  
 VEGFC,P49767,cAb3195,Rabbit,Polyclonal,cAb3193,Goat,Monoclonal  
 VEGFD,O43915,cAb1788,Rabbit,Monoclonal,cAb1789,Rabbit,Monoclonal  
 VSNL1,P62760,cAb520,Rabbit,Monoclonal,cAb521,Rabbit,Monoclonal

VSTM1,Q6UX27,cAb2337,Rabbit,Monoclonal,cAb2338,Mouse,Monoclonal  
WNT16,Q9UBV4,cAb1791,Rabbit,Monoclonal,cAb1790,Rabbit,Monoclonal  
WNT7A,O00755,cAb774,Rabbit,Monoclonal,cAb775,Rabbit,Monoclonal

Validation

Antibodies were validated for NULISA applications. The best performing antibody pair was selected based on signal, background, specificity and endogenous protein detectability.
